# Supplementary material for: A surprising way to control the charge transport in molecular electronics: the subtle impact of the coverage of self-assembled monolayers of floppy molecules adsorbed on metallic electrodes
Source: Royal Society of Chemistry journal article supplement (doi:10.1039/c7fd00101k), 2017-01-01
Supplement: c7fd00101k1.pdf [file c7fd00101k1.pdf]

# Electronic supplementary information for A surprising way to control the charge transport in molecular electronics: the subtle impact of the coverage of self-assembled monolayers of floppy molecules adsorbed on metallic electrodes

Ioan Bâldea \* <sup>a</sup>‡

## S1 List of acronyms

The acronyms used to indicate the various levels of theory employed to obtain the results presented in the paper are listed below:

- **PBE/cc-pVDZ**: DFT calculations<sup>1</sup> to isolated molecules using the PBE exchange correlation functional and cc-pVDZ Dunning double- $\zeta$  basis sets;
- **B3LYP/cc-pVDZ**: DFT calculations<sup>1</sup> to isolated molecules using the hybrid B3LYP exchange correlation functional and cc-pVDZ Dunning double- $\zeta$  basis sets;
- **PBE/cc-pVDZ/-PP**: DFT calculations<sup>1</sup> to isolated molecules using the PBE exchange correlation functional and cc-pVDZ Dunning double- $\zeta$  basis sets for non-metal atoms and with relativistic core potential (cc-pVDZ-PP<sup>2</sup>) for gold;
- **MP2/cc-pVDZ**: calculations for isolated molecules at second order Møller-Plesset level<sup>1</sup> using cc-pVDZ basis sets;
- **CCSD/cc-pVDZ**: CCSD (coupled cluster singles and doubles) calculations<sup>1</sup> for isolated molecules using cc-pVDZ basis sets;
- **0.02**: GGA-PBE SIESTA calculations for isolated molecules or SAMs adsorbed on fcc Au (111) surfaces; SZP basis set for gold, DZP basis sets for non-metal atoms; relaxation until forces on all atoms were smaller than 0.02 eV/Å; slab includes three fcc Au (111) layers. Unless otherwise specified, metal layers were always frozen at the periodicity defined by the experimental lattice constant  $a = 4.078 \text{ \AA}$  of gold;
- **0.01**: GGA-PBE SIESTA calculations for SAMs adsorbed on fcc Au (111) surfaces; SZP for gold, DZP for non-metal atoms; relaxation until forces on all atoms were smaller than 0.01 eV/Å; slab includes three fcc Au (111) layers;
- **0.005**: GGA-PBE SIESTA calculations; SZP for gold, DZP for non-metal atoms; relaxation until forces on all atoms were smaller than 0.005 eV/Å; slab includes three fcc Au (111) layers;
- **DZP-TZP**: GGA-PBE SIESTA calculations for SAMs adsorbed on fcc Au (111) surfaces; DZP for gold, TZP for non-metal atoms; relaxation until forces on all atoms were smaller than 0.02 eV/Å; slab includes three fcc Au (111) layers;
- **VDW-DRSLL**: VDW-DRSLL SIESTA calculations for SAMs adsorbed on fcc Au (111) surfaces including dispersion corrections<sup>3</sup>; SZP for gold, DZP for non-metal atoms; relaxation until forces on all atoms were smaller than 0.02 eV/Å; slab includes three fcc Au (111) layers;
- **CABCAB**: GGA-PBE SIESTA calculations; SZP for gold, DZP for non-metal atoms; relaxation until forces on all atoms were smaller than 0.02 eV/Å; slab includes six fcc Au (111) layers;
- **CAB-R**: GGA-PBE SIESTA calculations for SAMs adsorbed on fcc Au (111) surfaces; SZP for gold, DZP for non-metal atoms; relaxation until forces on all atoms were smaller than 0.02 eV/Å; slab includes three fcc Au (111) layers, wherein the top layer *was* allowed to relax;
- **CABCAB-R**: GGA-PBE SIESTA calculations for SAMs adsorbed on fcc Au (111) surfaces; SZP for gold, DZP for non-metal atoms; relaxation until forces on all atoms were smaller than 0.02 eV/Å; slab includes six fcc Au (111) layers, wherein the top layer *was* allowed to relax.

In the various tables presented in this ESI, the methods utilized are indicated in the first column.

## S2 Remarks on the various methods employed

For the benefit of a reader who is not expert in computational chemistry, a brief justification on the usage of the various

<sup>a</sup> Theoretische Chemie, Universität Heidelberg, Im Neuenheimer Feld 229, D-69120 Heidelberg, Germany.

‡ E-mail: ioan.baldea@pci.uni-heidelberg.de. Also at National Institute for Lasers, Plasmas, and Radiation Physics, Institute of Space Sciences, RO 077125, Bucharest-Măgurele, Romania

---

methods will be given below.

Whenever possible, from a fundamental perspective, *ab initio* methods are preferable to DFT approaches: ultimately, they are based on the Schrödinger equation, which they approximate in a certain way. Unlike the DFT approaches, their accuracy can be systematically improved. Unfortunately, *ab initio* approaches are very demanding computationally. For the cases considered in this paper, they can be only applied for isolated molecules (Sec. 3.1) or molecules containing a metal atoms (Sec. 3.2). MP2 and CCSD utilized there are *ab initio* methods.

In general, DFT approaches based on hybrid exchange-correlation functionals — B3LYP<sup>4,5</sup> is a popular example — are more accurately for chemical studies, but they are computationally more costly than DFT approaches based on generalized gradient approximations (GGA)<sup>6</sup> — like PBE<sup>7</sup> functional — ubiquitously used in material sciences.

Table S1, S2, S3 and S4, aim at justifying the fact that the results obtained at the DFT/PBE level of theory (especially the value of the torsional angle  $\varphi$ ) can be trusted; they are comparable both with those based on *ab initio* approaches and with those obtained with the aid of the hybrid B3LYP functional. From a pragmatic standpoint this comparison is important because hybrid functionals (like B3LYP) are not implemented in SIESTA, the package used in this paper to investigate SAMs; in SIESTA’s nomenclature, “hybrid” functionals represent nothing but mixing of GGA and LDA (local density approximation) functionals, and the latter is known to be very crude in describing chemical properties.

In all quantum chemical approaches basis sets are needed in calculations; the richer the basis sets, the better is the quality of the results, but employing larger basis sets is also more demanding computationally. The comparison of the results obtained with different basis sets (SZP, DZP, TZP) illustrates that using SZP for gold and DZP for non-metal atoms represents a reliable choice.

Last but not least, a thorny aspect of DFT approaches is often whether “dispersion corrections” substantially affect the results. By presenting results obtained by means of the VDW-DRSLL functional<sup>3</sup> we demonstrate that, for the presently considered systems, this is not the case.

## Notes and references

1 M. J. Frisch, G. W. Trucks, H. B. Schlegel, G. E. Scuseria, M. A. Robb, J. R. Cheeseman, G. Scalmani, V. Barone, B. Mennucci, G. A. Petersson, H. Nakatsuji, M. Caricato, X. Li, H. P. Hratchian, A. F. Izmaylov, J. Bloino, G. Zheng, J. L. Sonnenberg, M. Hada, M. Ehara, K. Toyota, R. Fukuda, J. Hasegawa, M. Ishida, T. Nakajima, Y. Honda, O. Kitao, H. Nakai, T. Vreven, J. A. Montgomery, Jr., J. E. Peralta, F. Ogliaro, M. Bearpark, J. J. Heyd, E. Brothers, K. N. Kudin, V. N. Staroverov, T. Keith, R. Kobayashi, J. Normand, K. Raghavachari, A. Rendell, J. C. Burant, S. S. Iyengar, J. Tomasi, M. Cossi, N. Rega, J. M. Millam, M. Klene, J. E. Knox, J. B. Cross, V. Bakken, C. Adamo, J. Jaramillo, R. Gomperts, R. E. Stratmann,

O. Yazyev, A. J. Austin, R. Cammi, C. Pomelli, J. W. Ochterski, R. L. Martin, K. Morokuma, V. G. Zakrzewski, G. A. Voth, P. Salvador, J. J. Dannenberg, S. Dapprich, A. D. Daniels, O. Farkas, J. B. Foresman, J. V. Ortiz, J. Cioslowski, and D. J. Fox, Gaussian, Inc., Wallingford CT, 2010 Gaussian 09, Revision B.01.

2 K. A. Peterson and C. Pizzarrini, *Theor. Chem. Acc.*, 2005, **114**, 283–296.

3 G. Román-Pérez and J. M. Soler, *Phys. Rev. Lett.*, 2009, **103**, 096102.

4 A. D. Becke, *J. Chem. Phys.*, 1993, **98**, 5648–5652.

5 C. Lee, W. Yang and R. G. Parr, *Phys. Rev. B*, 1988, **37**, 785–789.

6 J. P. Perdew, *Phys. Rev. B*, 1986, **33**, 8822–8824.

7 J. P. Perdew, K. Burke and M. Ernzerhof, *Phys. Rev. Lett.*, 1996, **77**, 3865–3868.

| Method, BPMT  | C <sub>1</sub> C <sub>2</sub> | C <sub>2</sub> C <sub>3</sub> | C <sub>3</sub> C <sub>4</sub> | C <sub>4</sub> C' <sub>4</sub> | C' <sub>1</sub> C' <sub>2</sub> | C' <sub>2</sub> C' <sub>3</sub> | C' <sub>3</sub> C' <sub>4</sub> | SC <sub>1</sub> | SC' <sub>1</sub> | φ      |
|---------------|-------------------------------|-------------------------------|-------------------------------|--------------------------------|---------------------------------|---------------------------------|---------------------------------|-----------------|------------------|--------|
| 0.02          | 1.4173                        | 1.4052                        | 1.4189                        | 1.4915                         | 1.4105                          | 1.4079                          | 1.4199                          | 1.7833          | 8.9871           | 38.855 |
| PBE/cc-pVDZ   | 1.4101                        | 1.3989                        | 1.4135                        | 1.4846                         | 1.4040                          | 1.4015                          | 1.4143                          | 1.7852          | 8.9585           | 36.447 |
| B3LYP/cc-pVDZ | 1.4031                        | 1.3941                        | 1.4069                        | 1.4859                         | 1.3981                          | 1.3962                          | 1.4079                          | 1.7888          | 8.9391           | 37.956 |
| MP2/cc-pVDZ   | 1.4101                        | 1.4023                        | 1.4124                        | 1.4835                         | 1.4059                          | 1.4040                          | 1.4130                          | 1.7856          | 8.9424           | 42.010 |
| CCSD/cc-pVDZ  | 1.4088                        | 1.4029                        | 1.4107                        | 1.4946                         | 1.4054                          | 1.4044                          | 1.4116                          | 1.7952          | 8.9628           | 42.988 |

**Table S1** Optimized geometry of an isolated BPMT molecule. Results obtained within various methods specified by means of the acronyms defined above for the twisting angle  $\phi$  and several bond lengths XY between various atoms X and Y labeled as shown in Fig. 1. For the nearly symmetric bonds C<sub>1</sub>-C<sub>2</sub> and C<sub>1</sub>-C<sub>6</sub>; C<sub>2</sub>-C<sub>3</sub> and C<sub>5</sub>-C<sub>4</sub>; C<sub>3</sub>-C<sub>4</sub> and C<sub>5</sub>-C<sub>4</sub> we only show their length averages, which are denoted here by C<sub>1</sub>C<sub>2</sub>; C<sub>2</sub>C<sub>3</sub>; C<sub>3</sub>C<sub>4</sub>, respectively, and similar for the other ring whose atoms are labeled by prime. Throughout, lengths are given in angstrom and angles in degrees.

| Method, BPDT  | C <sub>1</sub> C <sub>2</sub> | C <sub>2</sub> C <sub>3</sub> | C <sub>3</sub> C <sub>4</sub> | C <sub>4</sub> C' <sub>4</sub> | SC <sub>1</sub> | SC' <sub>1</sub> | φ      |
|---------------|-------------------------------|-------------------------------|-------------------------------|--------------------------------|-----------------|------------------|--------|
| 0.02          | 1.4170                        | 1.4050                        | 1.4194                        | 1.4883                         | 1.7841          | 8.9995           | 38.823 |
| PBE/cc-pVDZ   | 1.4102                        | 1.3988                        | 1.4139                        | 1.4826                         | 1.7852          | 8.9710           | 35.361 |
| B3LYP/cc-pVDZ | 1.4031                        | 1.3940                        | 1.4072                        | 1.4843                         | 1.7888          | 8.9058           | 37.092 |
| MP2/cc-pVDZ   | 1.4102                        | 1.4022                        | 1.4127                        | 1.4819                         | 1.7851          | 8.9525           | 40.990 |

**Table S2** Counterpart of Table S1 for an isolated BPDT molecule. See the caption of Table S1 and Fig. 1 for notations. Lengths in angstrom, angles in degrees.

| Method, BPMT-Au | C <sub>1</sub> C <sub>2</sub> | C <sub>2</sub> C <sub>3</sub> | C <sub>3</sub> C <sub>4</sub> | SC <sub>1</sub> | SC' <sub>1</sub> | AuS    |
|-----------------|-------------------------------|-------------------------------|-------------------------------|-----------------|------------------|--------|
| 0.02            | 1.4213                        | 1.4039                        | 1.4211                        | 1.7784          | 8.9750           | 2.3449 |
| DZP-TZP         | 1.4212                        | 1.4039                        | 1.4211                        | 1.7784          | 8.9766           | 2.3338 |
| PBE/cc-pVDZ     | 1.4131                        | 1.3978                        | 1.4159                        | 1.7873          | 8.9504           | 2.2748 |
| B3LYP/cc-pVDZ   | 1.4060                        | 1.3931                        | 1.4089                        | 1.7905          | 8.9336           | 2.2978 |
| MP2/cc-pVDZ-PP  | 1.4115                        | 1.4063                        | 1.4141                        | 1.7908          | 8.9374           | 2.2067 |

  

| Method, BPMT-Au | C' <sub>1</sub> C' <sub>2</sub> | C' <sub>2</sub> C' <sub>3</sub> | C' <sub>3</sub> C' <sub>4</sub> | C <sub>4</sub> C' <sub>4</sub> | φ      |
|-----------------|---------------------------------|---------------------------------|---------------------------------|--------------------------------|--------|
| 0.02            | 1.4108                          | 1.4076                          | 1.4200                          | 1.4897                         | 36.976 |
| DZP-TZP         | 1.4105                          | 1.4078                          | 1.4202                          | 1.4895                         | 37.067 |
| PBE/cc-pVDZ     | 1.4040                          | 1.4012                          | 1.4145                          | 1.4838                         | 35.368 |
| B3LYP/cc-pVDZ   | 1.3981                          | 1.3960                          | 1.4080                          | 1.4853                         | 37.044 |
| MP2/cc-pVDZ-PP  | 1.4059                          | 1.4040                          | 1.4130                          | 1.4834                         | 41.816 |

**Table S3** Optimized geometry of an isolated BPMT molecule wherein the H atom of the thiol group was replaced by a gold atom. In addition to data shown in Table S1, the Au-S bond length is indicated here. See the caption of Table S1 and Fig. 3 for notations. Lengths in angstrom, angles in degrees.

| Method, BPDT-Au | C <sub>1</sub> C <sub>2</sub> | C <sub>2</sub> C <sub>3</sub> | C <sub>3</sub> C <sub>4</sub> | C <sub>4</sub> C' <sub>4</sub> | SC <sub>1</sub> | SC' <sub>1</sub> | AuS    |
|-----------------|-------------------------------|-------------------------------|-------------------------------|--------------------------------|-----------------|------------------|--------|
| 0.02            | 1.4209                        | 1.4036                        | 1.4223                        | 1.4875                         | 1.7801          | 8.9926           | 2.3472 |
| DZP-TZP         | 1.4209                        | 1.4034                        | 1.4220                        | 1.4867                         | 1.7810          | 8.9921           | 2.3355 |
| PBE/cc-pVDZ     | 1.4133                        | 1.3973                        | 1.4168                        | 1.4808                         | 1.7861          | 8.9634           | 2.2763 |
| B3LYP/cc-pVDZ   | 1.4061                        | 1.3928                        | 1.4094                        | 1.4832                         | 1.7898          | 8.9454           | 2.2986 |
| MP2/cc-pVDZ-PP  | 1.4116                        | 1.4017                        | 1.4144                        | 1.4815                         | 1.7906          | 8.9487           | 2.2068 |

  

| Method, BPDT-Au | C' <sub>1</sub> C' <sub>2</sub> | C' <sub>2</sub> C' <sub>3</sub> | C' <sub>3</sub> C' <sub>4</sub> | S'C' <sub>1</sub> | S'C <sub>1</sub> | SS'     | φ      |
|-----------------|---------------------------------|---------------------------------|---------------------------------|-------------------|------------------|---------|--------|
| 0.02            | 1.4176                          | 1.4044                          | 1.4205                          | 1.7821            | 8.9984           | 10.7726 | 34.714 |
| DZP-TZP         | 1.4176                          | 1.4040                          | 1.4201                          | 1.7820            | 8.9937           | 10.7720 | 34.704 |
| PBE/cc-pVDZ     | 1.4108                          | 1.3978                          | 1.4147                          | 1.7825            | 8.9626           | 10.7446 | 32.661 |
| B3LYP/cc-pVDZ   | 1.4035                          | 1.3934                          | 1.4077                          | 1.7871            | 8.9452           | 10.7313 | 35.431 |
| MP2/cc-pVDZ-PP  | 1.4105                          | 1.4019                          | 1.4127                          | 1.7838            | 8.9445           | 10.7307 | 40.605 |

**Table S4** Optimized geometry of an isolated BPDT molecule wherein the H atom of a thiol group was replaced by a gold atom. In addition to data shown in Table S2, the Au-S bond length is indicated here. See the caption of Table S1 and Fig. 3 for notations. Lengths in angstrom, angles in degrees.

| Method, BPMT | $\varphi$ | $d^{(1)}$ | $d^{(2)}$ | $d^{(3)}$ | $L=SC$ | $z$    | $Z$     | $\theta$ |
|--------------|-----------|-----------|-----------|-----------|--------|--------|---------|----------|
| 0.02         | 36.615    | 2.6695    | 2.6768    | 2.9802    | 8.9634 | 2.1981 | 10.2616 | 32.727   |
| 0.005        | 36.410    | 2.6901    | 2.6939    | 3.0816    | 8.9899 | 2.2410 | 10.2506 | 32.521   |
| DZP-TZP      | 35.888    | 2.6729    | 2.6806    | 3.0414    | 8.9797 | 2.2167 | 10.2616 | 32.632   |

  

| Method, BPDT | $\varphi$ | $d^{(1)}$ | $d^{(2)}$ | $d^{(3)}$ | $L=SS$  | $z$    | $Z$     | $\theta$ |
|--------------|-----------|-----------|-----------|-----------|---------|--------|---------|----------|
| 0.02         | 33.866    | 2.6459    | 2.7968    | 2.8011    | 10.7372 | 2.1810 | 12.6341 | 13.867   |
| 0.01         | 33.311    | 2.6469    | 2.7967    | 2.7990    | 10.7382 | 2.1806 | 12.6347 | 13.873   |
| DZP-TZP      | 34.356    | 2.6452    | 2.7535    | 2.7755    | 10.7395 | 2.1537 | 12.7068 | 13.498   |
|              | 36.946    | 2.7358    | 2.9308    | 2.9523    | 10.7645 | 2.3316 | 12.8097 | 13.987   |

**Table S5** Results for SAMs consisting of BPMT and BPDT molecules arranged in a  $(6 \times 6)$  adsorbate unit cell on the fcc Au (111) surface (*cf.* Fig. 2a).  $d^{(1,2,3)}$  represent the distances of the sulfur atom to the closest gold atoms from the top layer.  $L$  is the length of the molecular backbone measured between the S and  $C'$  (or  $S'$ ) atoms of the opposite ends of the BPMT (or BPDT) molecule.  $\varphi$  is the twisting angle and  $z$  is the distance of the S atom to the top layer of the gold slab. The SAM height  $Z$  is defined as the distance between the top layer and the most distant H atom of the molecule. The tilt angle  $\theta$  is the angle between the molecular axis (line through the S and  $C'_1$  atoms for BPMT and through the S and  $S'$  atoms) and the gold surface. Lengths in angstrom, angles in degrees.

| Method, BPMT | $\varphi_1$ | $\theta_1$ | $d_1^{(1)}$ | $d_2^{(1)}$ | $d_3^{(1)}$ | $L_1$  | $z_1$  | $Z_1$   |
|--------------|-------------|------------|-------------|-------------|-------------|--------|--------|---------|
| 0.02         | 75.976      | 5.697      | 2.6564      | 2.6852      | 2.7880      | 8.9714 | 2.1430 | 12.1772 |
| DZP-TZP      | 76.024      | 5.699      | 2.6701      | 2.6842      | 2.7916      | 8.9708 | 2.1420 | 12.1739 |
| VDW-DRSLL    | 74.077      | 5.720      | 2.7552      | 2.7774      | 2.8779      | 9.0038 | 2.2526 | 12.3167 |
| CABCAB       | 73.856      | 5.745      | 2.6632      | 2.6903      | 2.7833      | 8.9700 | 2.1385 | 12.1703 |
| CAB-R        | 74.626      | 6.725      | —           | —           | —           | 8.9559 | —      | —       |
| CABCAB-R     | 74.936      | 7.933      | —           | —           | —           | 8.9080 | —      | —       |

  

| Method, BPMT | $\varphi_2$ | $\theta_2$ | $d_1^{(2)}$ | $d_2^{(2)}$ | $d_3^{(2)}$ | $L_2$  | $z_2$  | $Z_2$   |
|--------------|-------------|------------|-------------|-------------|-------------|--------|--------|---------|
| 0.02         | 75.935      | 5.670      | 2.6698      | 2.6860      | 2.7928      | 8.9721 | 2.1348 | 12.1700 |
| DZP-TZP      | 75.987      | 5.676      | 2.6570      | 2.6845      | 2.7872      | 8.9710 | 2.1345 | 12.1670 |
| VDW-DRSLL    | 77.179      | 5.745      | 2.7645      | 2.7700      | 2.8767      | 9.0011 | 2.2531 | 12.3141 |
| CABCAB       | 77.992      | 5.765      | 2.6757      | 2.6902      | 2.7882      | 8.9698 | 2.1459 | 12.1768 |
| CAB-R        | 78.294      | 6.945      | —           | —           | —           | 8.9494 | —      | —       |
| CABCAB-R     | 78.422      | 8.213      | —           | —           | —           | 8.9162 | —      | —       |

  

| Method, BPMT | $\alpha_u$ | $\alpha_l$ | $CC_u$ | $SS_l$ | $HH_{uu}$ | $HH_{ul}$ | $HH_{lu}$ | $HH_{ll}$ |
|--------------|------------|------------|--------|--------|-----------|-----------|-----------|-----------|
| 0.02         | 74.994     | 76.422     | 4.9670 | 4.9574 | 2.9802    | 2.9891    | 2.9943    | 2.9951    |
| DZP-TZP      | 75.060     | 76.456     | 4.9673 | 4.9603 | 2.9814    | 2.9907    | 2.9946    | 2.9958    |
| VDW-DRSLL    | 74.681     | 74.681     | 4.9700 | 4.9672 | 2.9770    | 2.9871    | 3.0206    | 3.0301    |
| CABCAB       | 75.042     | 75.042     | 4.9680 | 4.9607 | 2.9795    | 2.9899    | 2.9916    | 2.9941    |
| CAB-R        | 75.356     | 75.356     | 4.7935 | 4.9692 | 2.9653    | 2.9867    | 3.0204    | 2.9978    |
| CABCAB-R     | 75.205     | 75.205     | 4.2600 | 4.9714 | 2.9677    | 3.0044    | 3.0106    | 2.8924    |

**Table S6** Results for SAMs of BPMT forming a regular herringbone superstructure on an fcc Au (111) surface (*cf.* Fig. 2b). Here,  $d_1^{(1,2,3)}$  and  $d_2^{(1,2,3)}$  represent the shortest three (superscripts 1, 2, 3) S-Au bond lengths corresponding to the sulfur atoms of the two (subscripts 1, 2) crystallographically nonequivalent BPMT molecules having twisting angles denoted by  $\varphi_{1,2}$ ;  $\theta_{1,2}$  are the angles to the metal surface of the lines passing through the S and  $C'$  atoms at opposite molecular ends;  $z_{1,2}$  are the distances to the electrode surface of the two S atoms,  $Z_{1,2}$  are molecular heights, and  $L_{1,2}$  are the lengths of the molecular backbones measured between the S and  $C'$  atoms at opposite molecular ends. HH's, CC and SS denote distances between atoms belonging to the two molecules of the supercell as visible in Fig. 3, where the angles  $\alpha_{u,l}$  between oppositely placed rings on of the two nonequivalent molecules are also depicted. The reason why some entries are missing in this table is given in the main text. Lengths in angstrom, angles in degrees.

| Method, BPDT | $\varphi_1$ | $\theta_1$ | $d_1^{(1)}$ | $d_2^{(1)}$ | $d_3^{(1)}$ | $L_1$   | $z_1$  | $Z_1$   |
|--------------|-------------|------------|-------------|-------------|-------------|---------|--------|---------|
| 0.02         | 75.036      | 10.006     | 2.6287      | 2.7851      | 2.8833      | 10.7074 | 2.1973 | 12.8746 |
| DZP-TZP      | 71.881      | 9.990      | 2.6248      | 2.7842      | 2.8824      | 10.7071 | 2.1947 | 12.8733 |
| VDW-DRSLL    | 74.700      | 9.819      | 2.6976      | 2.8951      | 3.0177      | 10.7465 | 2.3192 | 13.0660 |
| 0.01         | 75.152      | 10.018     | 2.6313      | 2.78293     | 2.8719      | 10.7074 | 2.1939 | 12.8655 |
| 0.005        | 73.562      | 10.034     | 2.6276      | 2.7844      | 2.8706      | 10.7040 | 2.1922 | 12.8636 |
| CABCAB       | 74.672      | 10.277     | 2.6240      | 2.7827      | 2.8882      | 10.7041 | 2.1956 | 12.7280 |
| CAB-R        | 74.457      | 11.424     | —           | —           | —           | 10.6903 | —      | —       |
| CABCAB-R     | 74.541      | 11.695     | —           | —           | —           | 10.6784 | —      | —       |

  

| Method, BPDT | $\varphi_2$ | $\theta_2$ | $d_1^{(2)}$ | $d_2^{(2)}$ | $d_3^{(2)}$ | $L_2$   | $z_2$  | $Z_2$   |
|--------------|-------------|------------|-------------|-------------|-------------|---------|--------|---------|
| 0.02         | 75.561      | 10.244     | 2.6185      | 2.7865      | 2.8827      | 10.7056 | 2.1925 | 12.8523 |
| DZP-TZP      | 71.891      | 10.236     | 2.6151      | 2.7838      | 2.8814      | 10.7059 | 2.1892 | 12.8517 |
| VDW-DRSLL    | 71.583      | 9.933      | 2.7069      | 2.8957      | 2.9996      | 10.7472 | 2.3197 | 13.0580 |
| 0.01         | 75.322      | 10.227     | 2.6194      | 2.7784      | 2.8847      | 10.7093 | 2.1903 | 12.8472 |
| 0.005        | 73.779      | 10.270     | 2.6177      | 2.7900      | 2.8798      | 10.7105 | 2.1925 | 12.8508 |
| CABCAB       | 74.535      | 10.050     | 2.6355      | 2.7828      | 2.8854      | 10.7063 | 2.2005 | 12.7426 |
| CAB-R        | 74.769      | 11.382     | —           | —           | —           | 10.6789 | —      | —       |
| CABCAB-R     | 74.851      | 11.603     | —           | —           | —           | 10.6698 | —      | —       |

  

| Method, BPDT | $\alpha_u$ | $\alpha_l$ | $SS_u$ | $SS_l$ | $HH_{uu}$ | $HH_{ul}$ | $HH_{lu}$ | $HH_{ll}$ |
|--------------|------------|------------|--------|--------|-----------|-----------|-----------|-----------|
| 0.02         | 74.070     | 72.510     | 4.9710 | 5.7271 | 2.8833    | 2.9055    | 2.9227    | 3.3043    |
| DZP-TZP      | 75.221     | 71.801     | 4.9706 | 5.7265 | 2.884     | 2.9082    | 2.9257    | 3.3054    |
| VDW-DRSLL    | 76.439     | 72.953     | 5.0242 | 5.6716 | 2.9256    | 2.9084    | 2.9159    | 3.2629    |
| 0.01         | 74.418     | 71.066     | 4.9615 | 5.7349 | 2.8750    | 2.9170    | 2.9523    | 3.3215    |
| 0.005        | 74.335     | 72.760     | 4.9566 | 5.7366 | 2.8836    | 2.9326    | 2.9793    | 3.3506    |
| CABCAB       | 73.972     | 72.420     | 4.9697 | 5.7236 | 2.8831    | 2.9076    | 2.9261    | 3.3044    |
| CAB-R        | 74.580     | 70.779     | 4.9320 | 5.8431 | 2.8807    | 2.9444    | 3.0133    | 3.4369    |
| CABCAB-R     | 74.371     | 70.764     | 4.9361 | 5.6901 | 2.8813    | 2.9315    | 2.9907    | 3.3956    |

**Table S7** Results for SAMs of BPDT forming a regular herringbone superstructure on an fcc Au(111) surface (*cf.* Fig. 2b). See the caption of Table S6 and Fig. 3 for notations. The reason why some entries are missing is given in the main text. Lengths in angstrom, angles in degrees.
